# Supplementary material for: Investigation of the plasmonic effect in air-processed PbS/CdS core–shell quantum dot based solar cells
Source: Royal Society of Chemistry journal article supplement (doi:10.1039/c6ta04680k), 2016-01-01
Supplement: c6ta04680k1.pdf [file c6ta04680k1.pdf]

**Supporting Information for:**

**Investigation of Plasmonic Effect in Air-processed PbS/CdS Core-shell Quantum Dot based Solar Cells**

Belete Atomsa Gonfa<sup>1</sup>, Mee Rahn Kim<sup>1</sup>, Peng Zheng<sup>2</sup>, Scott Cushing<sup>2</sup>, Qiquan Qiao<sup>3</sup>, Nianqiang Wu<sup>2,\*</sup>, My Ali El Khakani<sup>1</sup>, and Dongling Ma<sup>1,\*</sup>

<sup>1</sup>Institut National de la Recherche Scientifique (INRS), Centre-Énergie, Matériaux et Télécommunications, 1650 Boulevard Lionel-Boulet, Varennes, QC, Canada J3X 1S2

<sup>2</sup>Department of Mechanical and Aerospace Engineering, West Virginia University, Morgantown, WV 26506-6106, USA

<sup>3</sup>Department of Electrical Engineering, Center for Advanced Photovoltaics, South Dakota State University, Brookings, South Dakota 57007, USA.

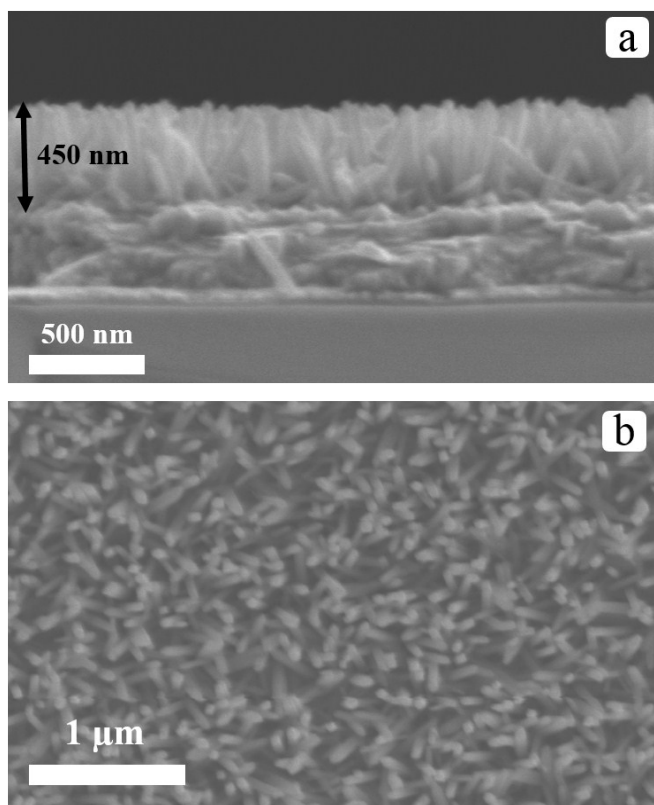

Figure S1. SEM images of 450 nm long  $\text{TiO}_2$  nanorod arrays grown on FTO substrate: (a) cross-sectional and (b) top view.

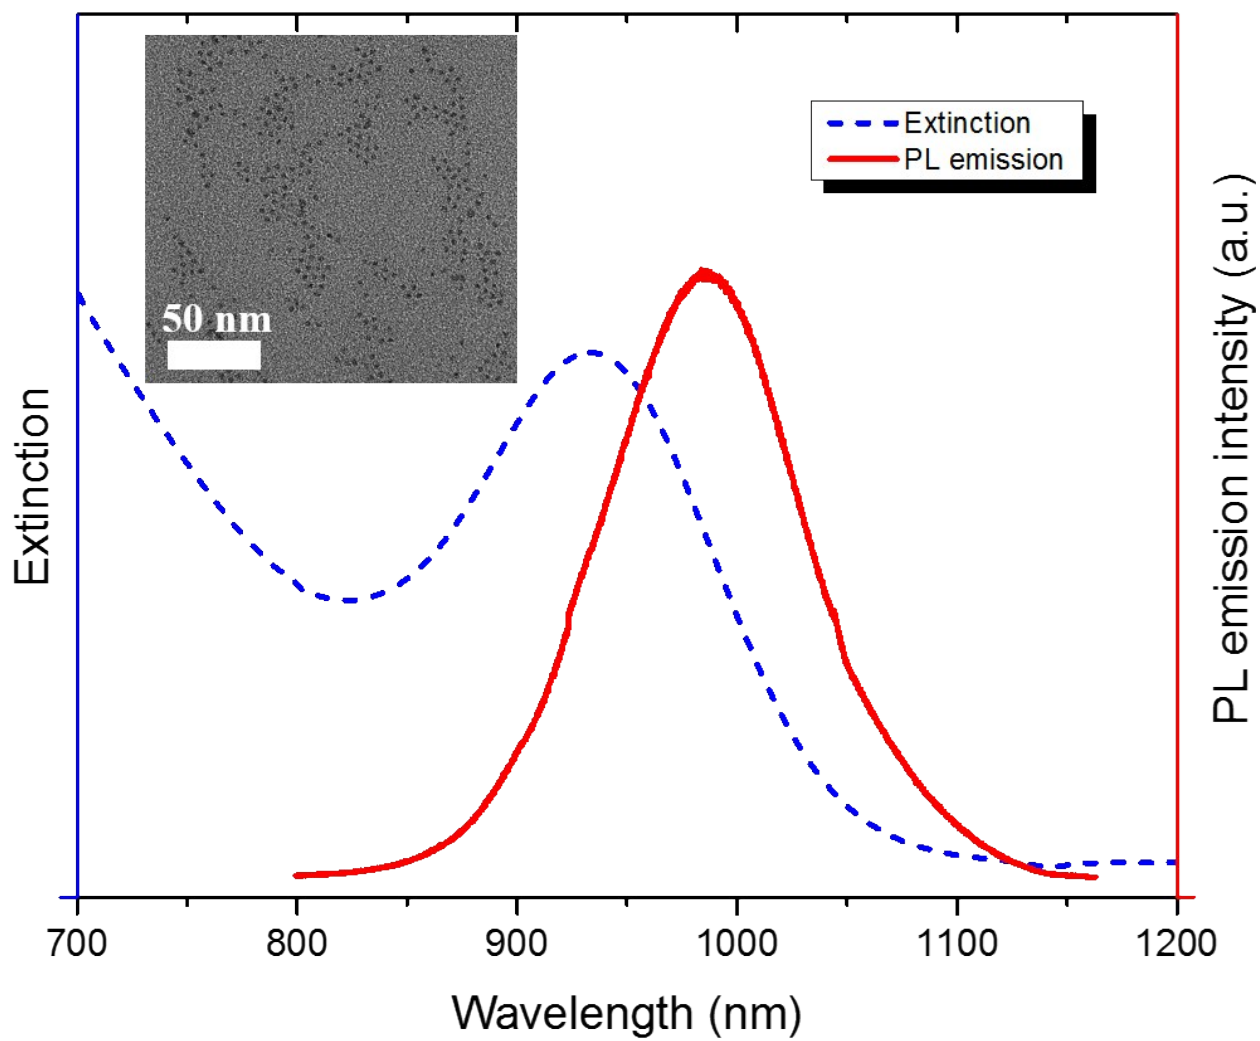

Figure S2. Visible-NIR extinction and PL emission spectra of PbS/CdS core-shell QDs suspension in toluene; inset: TEM image of PbS/CdS core-shell QDs.
